# Supplementary material
Source: PubMed Central journal article supplement (PMC4036208)
Supplement: supp_kwu046_kwu046supp.pdf [file supp_kwu046_kwu046supp.pdf]

Web Table 1. Adjusted<sup>a</sup> Linear Regression Models of Association of Prenatal DDT and DDE Exposure with BMI *z*-score, Waist Circumference *z*-score, and Body Fat (%) at 9 Years of Age, by Child Sex and Pubertal Status, CHAMACOS, 2000-2010.

| Exposure, by Outcome                      | Males                     |             | Females                   |             |                       |             | <i>P</i> -int |
|-------------------------------------------|---------------------------|-------------|---------------------------|-------------|-----------------------|-------------|---------------|
|                                           | Pre-pubertal <sup>b</sup> |             | Pre-pubertal <sup>b</sup> |             | Pubertal <sup>b</sup> |             |               |
|                                           | Adj. $\beta^c$            | 95% CI      | Adj. $\beta$              | 95% CI      | Adj. $\beta$ (95% CI) |             |               |
| <b>BMI <i>z</i>-score</b>                 |                           |             |                           |             |                       |             |               |
| <i>o,p'</i> -DDT                          | 0.33                      | 0.06, 0.60  | 0.08                      | -0.26, 0.43 | -0.35                 | -0.86, 0.17 | 0.16          |
| <i>p,p'</i> -DDT                          | 0.21                      | 0.01, 0.42  | 0.02                      | -0.30, 0.35 | -0.19                 | -0.68, 0.31 | 0.47          |
| <i>p,p'</i> -DDE                          | 0.21                      | -0.05, 0.47 | -0.06                     | -0.51, 0.39 | -0.09                 | -0.78, 0.60 | 0.94          |
| <b>Waist circumference <i>z</i>-score</b> |                           |             |                           |             |                       |             |               |
| <i>o,p'</i> -DDT                          | 0.27                      | 0.06, 0.49  | 0.12                      | -0.20, 0.44 | -0.31                 | -0.75, 0.13 | 0.11          |
| <i>p,p'</i> -DDT                          | 0.21                      | 0.05, 0.37  | 0.06                      | -0.24, 0.35 | -0.13                 | -0.54, 0.28 | 0.45          |
| <i>p,p'</i> -DDE                          | 0.21                      | 0.00, 0.42  | -0.03                     | -0.43, 0.37 | -0.06                 | -0.63, 0.52 | 0.92          |
| <b>Body fat (%)</b>                       |                           |             |                           |             |                       |             |               |
| <i>o,p'</i> -DDT                          | 1.48                      | -1.23, 4.20 | -0.08                     | -2.88, 2.72 | -2.94                 | -8.38, 2.50 | 0.33          |
| <i>p,p'</i> -DDT                          | 1.12                      | -0.98, 3.22 | -0.96                     | -3.33, 1.41 | -0.96                 | -5.97, 4.04 | 0.99          |
| <i>p,p'</i> -DDE                          | 0.46                      | -2.30, 3.22 | -2.55                     | -6.09, 1.00 | 2.32                  | -5.59, 10.2 | 0.26          |

Abbreviations:  $\beta$ , beta; BMI, body mass index; CHAMACOS, Center for the Health Assessment of Mothers and Children of Salinas; CI, confidence interval; DDE, dichlorodiphenyldichloroethylene; DDT, dichlorodiphenyltrichloroethane.

<sup>a</sup> Adjusted for maternal pre-pregnancy BMI and time in the US at birth.

<sup>b</sup> Children with BMI *z*-score and waist circumference data (101 pre-pubertal males, 82 pre-pubertal females, 54 pubertal females).

Children with body fat data (90 pre-pubertal males, 68 pre-pubertal females, 45 pubertal females).

<sup>c</sup>  $\beta$  is for a 10-fold increase in exposure.

Web Table 2. Adjusted<sup>a</sup> Logistic Regression Models of Association of Prenatal DDT and DDE Exposure with Overweight and Increased Waist Circumference at 9 Years of Age, by Child Sex and Pubertal Status, CHAMACOS, 2000-2010.

| Outcome                       | Males                     |            | Females                   |            |                       |            | <i>P</i> -int |
|-------------------------------|---------------------------|------------|---------------------------|------------|-----------------------|------------|---------------|
|                               | Pre-pubertal <sup>b</sup> |            | Pre-pubertal <sup>b</sup> |            | Pubertal <sup>b</sup> |            |               |
|                               | Adj. OR <sup>c</sup>      | 95% CI     | Adj. OR <sup>c</sup>      | 95% CI     | Adj. OR <sup>c</sup>  | 95% CI     |               |
| Overweight/obese              |                           |            |                           |            |                       |            |               |
| <i>o,p'</i> -DDT              | 2.30                      | 0.91, 5.78 | 0.97                      | 0.55, 1.74 | 0.60                  | 0.23, 1.62 | 0.40          |
| <i>p,p'</i> -DDT              | 1.95                      | 0.92, 4.14 | 0.92                      | 0.53, 1.62 | 0.80                  | 0.34, 1.89 | 0.77          |
| <i>p,p'</i> -DDE              | 1.97                      | 0.93, 4.18 | 0.69                      | 0.29, 1.63 | 0.87                  | 0.24, 3.16 | 0.76          |
| Increased waist circumference |                           |            |                           |            |                       |            |               |
| <i>o,p'</i> -DDT              | 1.94                      | 0.93, 4.05 | 1.04                      | 0.58, 1.86 | 0.72                  | 0.28, 1.87 | 0.50          |
| <i>p,p'</i> -DDT              | 2.03                      | 1.08, 3.79 | 1.03                      | 0.58, 1.81 | 0.85                  | 0.37, 1.98 | 0.71          |
| <i>p,p'</i> -DDE              | 2.00                      | 0.98, 4.07 | 0.85                      | 0.36, 1.97 | 0.88                  | 0.26, 2.95 | 0.96          |

Abbreviations: BMI, body mass index; CHAMACOS, Center for the Health Assessment of Mothers and Children of Salinas; CI, confidence interval; DDE, dichlorodiphenyldichloroethylene; DDT, dichlorodiphenyltrichloroethane; OR, odds ratio.

<sup>a</sup> All models adjusted for maternal pre-pregnancy BMI and time in the US at birth.

<sup>b</sup> Overweight/obese cases (58 pre-pubertal male, 35 pre-pubertal female, 35 pubertal female). Increased waist circumference cases (38 pre-pubertal male, 34 pre-pubertal female, 33 pubertal female).

<sup>c</sup> OR is for a 10-fold increase in exposure.
